# Supplementary material for: Metabolic derangement in polycystic kidney disease mouse models is ameliorated by mitochondrial-targeted antioxidants
Source: PubMed Central journal article supplement (PMC8528863; doi:10.1038/s42003-021-02730-w), 2021-10-20
Supplement: 42003_2021_2730_MOESM4_ESM.pdf [file 42003_2021_2730_MOESM4_ESM.pdf]

|                                                   |                                                                                           |        |       |        |       |        |       |        |       |        |       |        |        |        |        |
|---------------------------------------------------|-------------------------------------------------------------------------------------------|--------|-------|--------|-------|--------|-------|--------|-------|--------|-------|--------|--------|--------|--------|
| mdh2                                              | malate dehydrogenase 2, NAD (mitochondrial)                                               | 2.671  | 0.513 | 1.775  | 0.265 | 1.716  | 0.173 | 0.670  | 0.074 | 0.833  | 0.026 | -0.363 | 0.030  | -0.590 | 0.228  |
| Glud1                                             | glutamate dehydrogenase 1                                                                 | 2.362  | 0.897 | 1.534  | 0.152 | 1.850  | 0.115 | 0.917  | 0.186 | 0.950  | 0.019 | N.S    | 0.214  | -0.426 | -0.095 |
| got1                                              | glutamic-oxaloacetic transaminase 1, soluble                                              | 0.664  | 0.223 | 0.310  | 0.022 | 0.342  | 0.037 | 0.170  | 0.023 | 0.215  | 0.029 | -0.475 | 0.090  | -0.454 | 0.164  |
| got2                                              | glutamic-oxaloacetic transaminase 2, mitochondrial                                        | 1.697  | 0.286 | 1.190  | 0.104 | 1.217  | 0.099 | 0.563  | 0.089 | 0.737  | 0.021 | -0.291 | 0.037  | -0.526 | 0.301  |
| <b>Respiratory Complexes and Related Proteins</b> |                                                                                           |        |       |        |       |        |       |        |       |        |       |        |        |        |        |
| Ndurf1                                            | NADH dehydrogenase (ubiquinone) Fe-S protein 1                                            | 1.107  | 0.276 | 0.800  | 0.069 | 0.628  | 0.097 | 0.338  | 0.018 | 0.425  | 0.023 | -0.240 | -0.271 | -0.566 | 0.725  |
| Ndurfv1                                           | NADH dehydrogenase (ubiquinone) flavoprotein 1                                            | 0.888  | 0.194 | 0.690  | 0.052 | 0.585  | 0.091 | 0.325  | 0.024 | 0.341  | 0.032 | -0.188 | -0.209 | -0.522 | 0.325  |
| sdha                                              | succinate dehydrogenase complex, subunit A, flavoprotein (Fp)                             | 2.519  | 0.254 | 2.030  | 0.248 | 2.567  | 0.129 | 0.635  | 0.034 | 0.768  | 0.065 | -0.235 | 0.343  | -0.667 | -0.102 |
| sdhb                                              | succinate dehydrogenase complex, subunit B, iron sulfur (Ip)                              | 0.568  | 0.063 | 0.453  | 0.057 | 0.461  | 0.045 | 0.157  | 0.020 | 0.234  | 0.010 | -0.242 | 0.061  | -0.638 | 0.436  |
| sdhc                                              | succinate dehydrogenase complex, subunit C, integral membrane protein                     | 0.220  | 0.019 | 0.201  | 0.026 | 0.265  | 0.033 | 0.100  | 0.002 | 0.099  | 0.006 | -0.138 | 0.350  | -0.466 | -0.274 |
| etfa                                              | electron transferring flavoprotein, alpha polypeptide                                     | 1.260  | 0.276 | 0.797  | 0.115 | 1.110  | 0.112 | 0.243  | 0.024 | 0.387  | 0.054 | -0.377 | 0.480  | -0.672 | 0.069  |
| etfb                                              | electron transferring flavoprotein, beta polypeptide                                      | 2.549  | 0.572 | 1.863  | 0.225 | 2.177  | 0.230 | 0.628  | 0.086 | 0.708  | 0.076 | -0.262 | 0.217  | -0.647 | -0.060 |
| etfdh                                             | electron transferring flavoprotein, dehydrogenase                                         | 0.835  | 0.197 | 0.531  | 0.064 | 0.645  | 0.057 | 0.216  | 0.018 | 0.251  | 0.010 | -0.360 | 0.271  | -0.568 | -0.079 |
| Coq6                                              | coenzyme Q6 homolog (yeast)                                                               | 0.040  | 0.009 | 0.025  | 0.003 | 0.031  | 0.003 | 0.017  | 0.002 | 0.015  | 0.001 | -0.364 | 0.283  | -0.302 | -0.299 |
| Uqcrc1                                            | ubiquinol-cytochrome c reductase core protein 1                                           | 2.984  | 0.619 | 2.244  | 0.206 | 2.157  | 0.201 | 0.625  | 0.062 | 0.865  | 0.131 | -0.234 | -0.035 | -0.715 | 0.423  |
| Atp5a1                                            | ATP synthase, H+ transporting, mitochondrial F1 complex, alpha subunit 1                  | 14.823 | 1.367 | 9.017  | 1.192 | 10.672 | 0.923 | 5.417  | 0.734 | 6.904  | 0.634 | -0.427 | 0.243  | -0.374 | 0.046  |
| Atp5b                                             | ATP synthase, H+ transporting mitochondrial F1 complex, beta subunit                      | 16.525 | 1.622 | 11.896 | 1.169 | 12.496 | 0.960 | 4.973  | 0.705 | 6.771  | 0.593 | -0.298 | 0.072  | -0.578 | 0.298  |
| <b>Proteostasis Pathways</b>                      |                                                                                           |        |       |        |       |        |       |        |       |        |       |        |        |        |        |
| Cryab                                             | crystallin, alpha B                                                                       | 0.142  | 0.020 | 0.044  | 0.007 | 0.064  | 0.003 | 0.044  | 0.010 | 0.056  | 0.012 | -0.707 | 0.578  | N.S    | -0.171 |
| hsp90b1                                           | heat shock protein 90, beta (Grp94), member 1                                             | 1.056  | 0.142 | 1.293  | 0.097 | 1.112  | 0.090 | 1.236  | 0.251 | 1.243  | 0.120 | 0.157  | N.S    | N.S    | N.S    |
| hspa1a                                            | heat shock protein 1A                                                                     | 1.974  | 0.110 | 1.568  | 0.137 | 1.491  | 0.119 | 1.451  | 0.224 | 1.497  | 0.295 | N.S    | N.S    | -0.106 | N.S    |
| hspa5                                             | heat shock protein 5                                                                      | 0.291  | 0.016 | 0.270  | 0.030 | 0.192  | 0.021 | 0.253  | 0.060 | 0.291  | 0.034 | -0.139 | -0.253 | N.S    | 0.542  |
| hspa9                                             | heat shock protein 9                                                                      | 0.785  | 0.163 | 0.611  | 0.102 | 0.561  | 0.069 | 0.217  | 0.045 | 0.235  | 0.020 | -0.160 | N.S    | -0.605 | N.S    |
| hspd1                                             | heat shock protein 1 (chaperonin)                                                         | 1.407  | 0.194 | 1.259  | 0.108 | 1.023  | 0.102 | 0.687  | 0.115 | 0.792  | 0.016 | N.S    | -0.214 | -0.479 | 0.532  |
| lonp1                                             | lon peptidase 1, mitochondrial                                                            | 0.205  | 0.046 | 0.176  | 0.015 | 0.204  | 0.011 | 0.095  | 0.006 | 0.117  | 0.007 | N.S    | 0.168  | -0.449 | N.S    |
| lonp2                                             | lon peptidase 2, peroxisomal                                                              | 0.023  | 0.003 | 0.021  | 0.004 | 0.024  | 0.002 | 0.008  | 0.003 | 0.012  | 0.004 | -0.205 | 0.332  | -0.625 | 0.175  |
| <b>Peroxisomal Proteins</b>                       |                                                                                           |        |       |        |       |        |       |        |       |        |       |        |        |        |        |
| Abcd3                                             | ATP-binding cassette, sub-family D (ALD), member 3                                        | 0.465  | 0.058 | 0.544  | 0.071 | 0.645  | 0.090 | 0.217  | 0.022 | 0.200  | 0.015 | N.S    | 0.262  | -0.560 | -0.262 |
| Acox1                                             | acyl-Coenzyme A oxidase 1, palmitoyl                                                      | 0.327  | 0.063 | 0.429  | 0.071 | 0.487  | 0.075 | 0.087  | 0.008 | 0.142  | 0.040 | N.S    | 0.278  | -0.752 | 0.187  |
| Ech1                                              | enoyl coenzyme A hydratase 1, peroxisomal                                                 | 0.927  | 0.127 | 0.917  | 0.118 | 1.104  | 0.101 | 0.366  | 0.031 | 0.392  | 0.016 | N.S    | 0.247  | -0.580 | -0.134 |
| Ephx2                                             | Epoxide Hydrolase 2                                                                       | 0.783  | 0.141 | 1.790  | 0.357 | 2.004  | 0.342 | 0.317  | 0.110 | 0.326  | 0.016 | 0.820  | 0.289  | -0.809 | N.S    |
| mdh1                                              | malate dehydrogenase 1, NAD (soluble)                                                     | 8.040  | 0.796 | 6.655  | 0.859 | 7.770  | 0.741 | 2.961  | 0.234 | 3.708  | 0.597 | -0.218 | 0.221  | -0.525 | N.S    |
| Pecr                                              | peroxisomal trans-2-enoyl-CoA reductase                                                   | 2.617  | 0.911 | 3.403  | 0.702 | 3.605  | 0.611 | 0.254  | 0.086 | 0.394  | 0.128 | 0.269  | 0.276  | -0.918 | 0.333  |
| slc25a20                                          | solute carrier family 25 (mitochondrial carnitine/acylcarnitine translocase) 20           | 0.485  | 0.090 | 0.330  | 0.027 | 0.274  | 0.025 | 0.195  | 0.018 | 0.220  | 0.020 | -0.305 | -0.170 | -0.400 | 0.363  |
| <b>Other Mitochondrial Proteins</b>               |                                                                                           |        |       |        |       |        |       |        |       |        |       |        |        |        |        |
| Atp2a2                                            | ATPase, Ca++ transporting, cardiac muscle, slow twitch 2                                  | 0.139  | 0.010 | 0.138  | 0.009 | 0.159  | 0.035 | 0.117  | 0.003 | 0.179  | 0.018 | N.S    | 0.046  | -0.139 | 0.443  |
| cd36                                              | CD36 antigen                                                                              | 0.151  | 0.019 | 0.159  | 0.026 | 0.136  | 0.024 | 0.034  | 0.005 | 0.041  | 0.007 | -0.071 | -0.106 | -0.761 | 0.345  |
| Clpp                                              | caseinolytic mitochondrial matrix peptidase proteolytic subunit                           | 0.214  | 0.047 | 0.266  | 0.029 | 0.283  | 0.036 | 0.121  | 0.020 | 0.133  | 0.003 | 0.269  | 0.077  | -0.537 | 0.059  |
| Clpx                                              | caseinolytic mitochondrial matrix peptidase chaperone subunit                             | 0.105  | 0.013 | 0.121  | 0.011 | 0.122  | 0.008 | 0.127  | 0.005 | 0.146  | 0.007 | 0.137  | 0.035  | 0.089  | 0.109  |
| ckmt1                                             | creatine kinase, mitochondrial 2                                                          | 1.898  | 1.389 | 0.473  | 0.079 | 0.568  | 0.091 | 0.314  | 0.148 | 0.245  | 0.068 | -0.543 | 0.227  | -0.460 | -0.100 |
| prkaca                                            | protein kinase, cAMP dependent, catalytic, alpha                                          | 0.069  | 0.006 | 0.052  | 0.003 | 0.050  | 0.003 | 0.059  | 0.003 | 0.061  | 0.002 | -0.239 | -0.032 | 0.133  | 0.076  |
| Rhot1                                             | Ras Homolog Family Member T1                                                              | 0.162  | 0.012 | 0.144  | 0.012 | 0.159  | 0.010 | 0.076  | 0.002 | 0.096  | 0.003 | -0.129 | 0.127  | -0.459 | 0.130  |
| Sam50                                             | sorting and assembly machinery component 50 homolog (S. cerevisiae)                       | 0.395  | 0.039 | 0.275  | 0.016 | 0.248  | 0.036 | 0.167  | 0.018 | 0.209  | 0.011 | -0.305 | -0.149 | -0.394 | 0.491  |
| slc25a11                                          | solute carrier family 25 (mitochondrial carrier oxoglutarate carrier), member 11          | 0.925  | 0.231 | 0.662  | 0.069 | 0.627  | 0.050 | 0.297  | 0.017 | 0.364  | 0.022 | -0.266 | N.S    | -0.529 | 0.229  |
| Slc25a4                                           | solute carrier family 25 (mitochondrial carrier, adenine nucleotide translocator), member | 1.932  | 0.029 | 1.348  | 0.091 | 1.914  | 0.302 | 0.909  | 0.038 | 1.201  | 0.074 | -0.313 | 0.348  | -0.324 | N.S    |
| Slc25a4/5/31                                      | solute carrier family 25 (mitochondrial carrier, adenine nucleotide translocator), member | 41.064 | 3.015 | 33.056 | 2.755 | 38.219 | 2.826 | 13.184 | 0.955 | 18.025 | 2.460 | -0.211 | 0.171  | -0.592 | 0.153  |
| Tufm                                              | Tu translation elongation factor, mitochondrial                                           | 0.412  | 0.079 | 0.357  | 0.031 | 0.360  | 0.024 | 0.132  | 0.010 | 0.192  | 0.019 | -0.118 | 0.024  | -0.622 | 0.416  |

\* The magnitude of effects are calculated only for those with significant changes; NS= not significant
